# Supplementary material for: Highly luminescent bis-diketone lanthanide complexes with triple-stranded dinuclear structure
Source: Royal Society of Chemistry journal article supplement (doi:10.1039/c1dt11496d), 2011-11-17
Supplement: c1dt11496d.pdf [file c1dt11496d.pdf]

## Supplementary Information

### Highly Luminescent Bis-Diketone Lanthanide Complexes with Triple-Stranded Dinuclear Structure

Hong-Feng Li, Peng-Fei Yan,\* Peng Chen, Yan Wang, Hui Xu, Guang-Ming Li\*

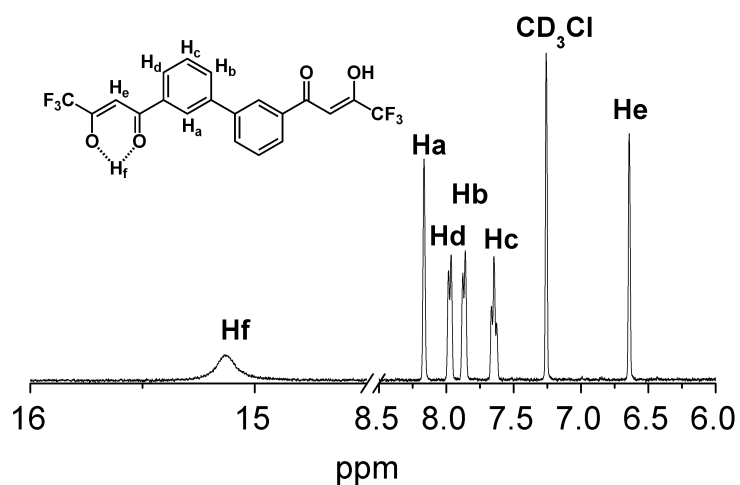

Fig. S1 400 MHz <sup>1</sup>H NMR spectrum of BTB in CDCl<sub>3</sub>.

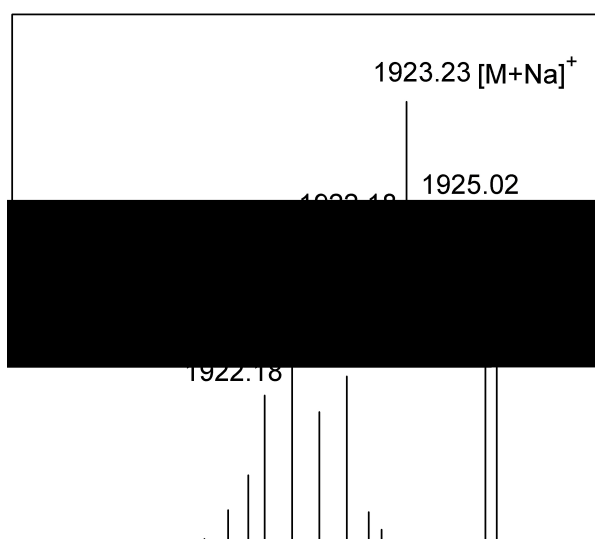

Fig. S2 Expanded regions of the ESI-MS of Eu<sub>2</sub>(BTB)<sub>3</sub>(bpy)<sub>2</sub> in methanol/toluene.

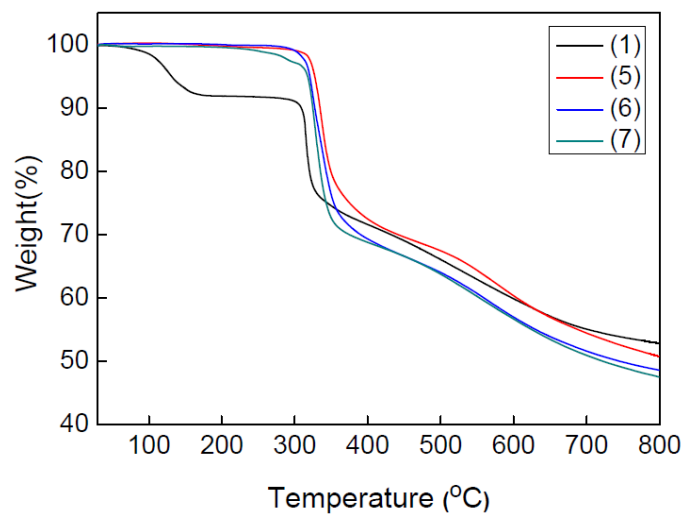

**Fig. S3** Thermogravimetric curves for the complex **1** and **5–7**.

(a)

(b)

**Fig. S4** Intermolecular C–H···F interactions of complex **1**, viewing along the direction of the [001] (a), and [010] (b).

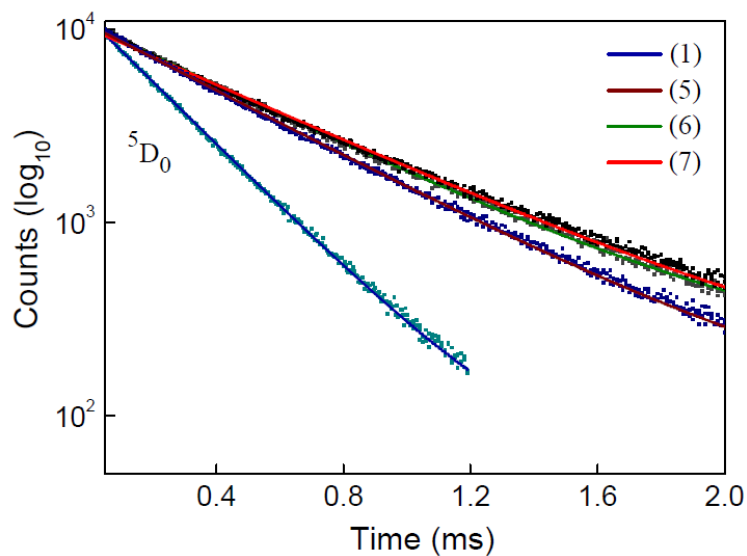

Fig. S5 Luminescence decay curves of complex **1** and **5-7** monitored at 614 nm.

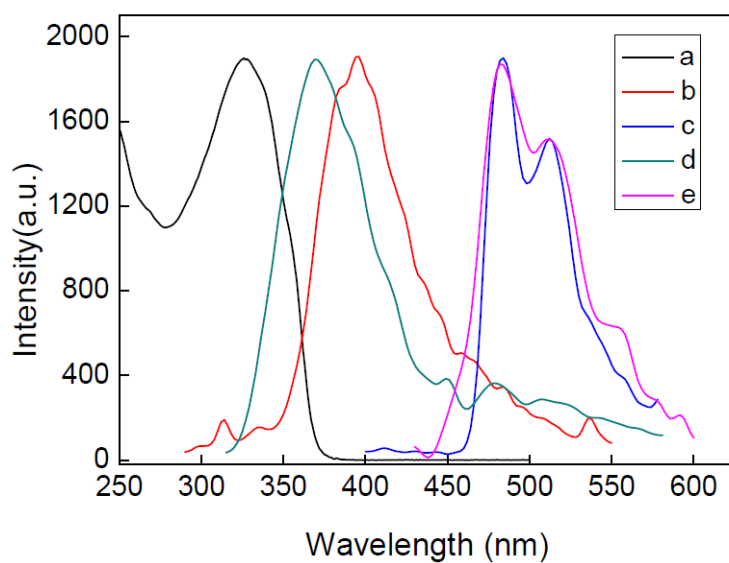

Fig. S6 (a) UV-vis absorption spectrum of BTB at room temperature; (b) Emission spectrum of BTB at room temperature; (c) Phosphorescence spectrum of **2** at 77K; (d) Emission spectrum of phen at room temperature; (e) Phosphorescence spectrum of Gd(phen)<sub>2</sub>(NO<sub>3</sub>)<sub>3</sub> at 77K.

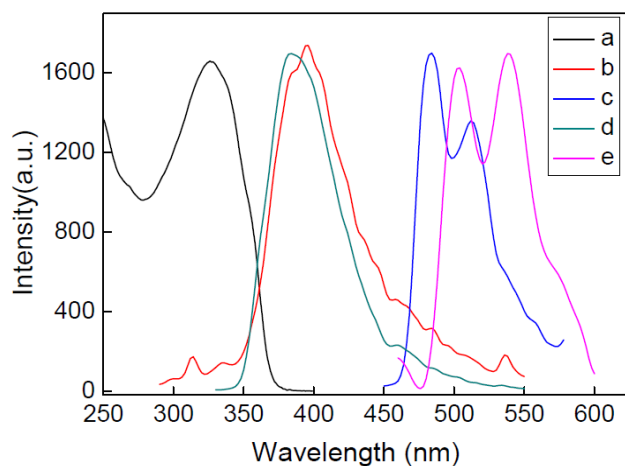

**Fig. S7** (a) UV-vis absorption spectrum of BTB at room temperature; (b) Emission spectrum of BTB at room temperature; (c) Phosphorescence spectrum of **2** at 77K; (d) Emission spectrum of bath at room temperature; (e) Phosphorescence spectrum of Gd(bath)<sub>2</sub>(NO<sub>3</sub>)<sub>3</sub> at 77K.

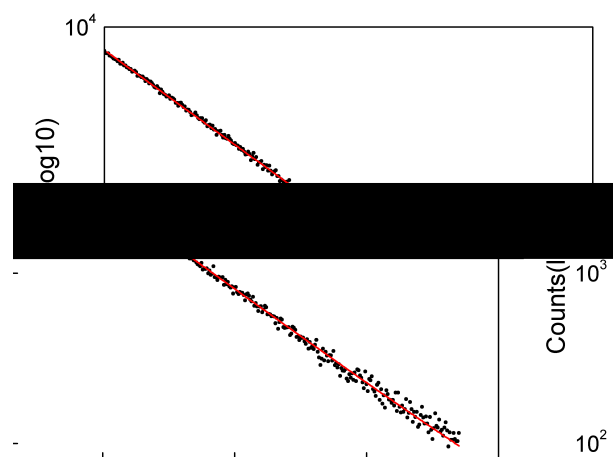

**Fig. S8** Luminescence decay curves of complex **4** monitored at 977 nm.
